# Supplementary material
Source: publisher figshare collection journal article supplement (https://karger.figshare.com/ndownloader/files/24182492)
Supplement: Supplementary file 1 [file 24182492]

**Plasma P-selectin is inversely associated with lung function and corticosteroid responsiveness in asthma**

**Online Supplement**

**Mats W. Johansson, Brandon M. Grill, Karina T. Barretto, Molly C. Favour, Hazel M. Schira, Calvin M. Swanson, Kristine E. Lee, Ronald L. Sorkness, Deane F. Mosher, Loren C. Denlinger, Nizar N. Jarjour**

**Supplemental Table 1.** FEV1 (% predicted) at baseline and post-intramuscular triamcinolone acetonide (TA) administration in patients divided by BPS quartiles

____________________________________________________________________________________________________________

Visit

_______________________________

Group Baseline Post-TA *p*

____________________________________________________________________________________________________________

1st quartile (“BPS-very low”) (13) 84 ± 15 89 ± 17 0.009

2nd quartile (“BPS -medium-low”) (14) 84 ± 24 85 ± 23 0.12

3rd quartile (“BPS-medium-high”) (14) 85 ± 21 87 ± 21 0.41

4th quartile (“BPS-very high”) (13) 61 ± 17** 62 ± 16†††,## 0.79

____________________________________________________________________________________________________________

Data are presented as mean ± SD. FEV1 = pre-bronchodilation FEV1. BPS, baseline P-selectin; FEV1, forced expiratory volume in 1 s. ***p* ≤ 0.01 versus 1st (≤ 14.5 ng/ml), 2nd (14.5-23.1 ng/ml) or 3rd quartile (23.1-34.5 ng/ml), †††*p* ≤ 0.01 versus 3rd quartile, ##*p* ≤ 0.01 versus 2nd or 3rd quartile (4th quartile is > 34.5 ng/ml).
